# Supplementary material for: Maternal galactooligosaccharides supplementation programmed immune defense, microbial colonization and intestinal development in piglets
Source: Royal Society of Chemistry journal article supplement (doi:10.1039/d1fo00084e), 2021-01-01
Supplement: d1fo00084e1.pdf [file d1fo00084e1.pdf]

1 **Table S1. Compositions of diets for sows during late gestation and lactation**

| Ingredients        | Nutrient composition <sup>#</sup> |           |              |           |           |
|--------------------|-----------------------------------|-----------|--------------|-----------|-----------|
|                    | Gestation                         | Lactation |              | Gestation | Lactation |
| Corn               | 63.17                             | 58.81     | DM           | 88.73     | 88.04     |
| Soybean meal       | 16.75                             | 26.50     | DE (Mcal/kg) | 3269      | 3332      |
| Wheat bran         | 14.00                             | 8.71      | CP           | 15.12     | 18.11     |
| Soybean oil        | 2.50                              | 2.50      | Ca           | 0.68      | 0.80      |
| CaHPO <sub>4</sub> | 0.81                              | 1.45      | TP           | 0.58      | 0.68      |
| Limestone          | 1.17                              | 1.05      | AP           | 0.29      | 0.34      |
| Salt               | 0.50                              | 0.50      |              |           |           |
| Lysine             | 0.24                              | 0.08      |              |           |           |
| Threonine          | 0.05                              | -         |              |           |           |
| Tryptophan         | 0.01                              | -         |              |           |           |
| Premix*            | 0.50                              | 0.50      |              |           |           |
| Total              | 100                               | 100       |              |           |           |

2 \* Provided the following per kg of complete diet: vitamin A, 12,000 IU; vitamin E, 24  
3 IU; vitamin K3, 2.0 mg; thiamine, 2.0 mg; riboflavin, 6.0 mg; pyridoxine, 4 mg; vitamin  
4 B12, 24 mg; niacin, 30 mg; pantothenic acid, 20 mg; folic acid, 3.6 mg; biotin, 0.4 mg;  
5 choline chloride, 0.4 mg; iron, 96 mg; copper, 8.0 mg; zinc, 120 mg; manganese, 40  
6 mg; iodine, 0.56 mg; selenium, 0.4 mg.

7 <sup>#</sup> Calculated value.

8 DM, dry matter; DE, digestible energy; CP, crude protein; TP, total phosphorus; AP,  
9 available phosphorus

10 **Table S2. Primer sequences of tight junctions, mucins and GPRs**

| Genes            | Primer sequence (5'→3')    | Genbank No.    |
|------------------|----------------------------|----------------|
| <i>GAPDH</i>     | F: ACCCAGAAGACTGTGGATGG    | NM_008084      |
|                  | R: AAGCAGGGATGATGTTCTGG    |                |
| <i>Occludin</i>  | F: ATCAACAAAGGCAACTCT      | XM_005672525.3 |
|                  | R: GCAGCAGCCATGTACTCT      |                |
| <i>Claudin-1</i> | F: AAGGACAAAACCGTGTGGGA    | NM_001244539.1 |
|                  | R: CTCTCCCCACATTCGAGATGATT |                |
| <i>Claudin-2</i> | F: GCTGGCGAACGAGTTCTTAC    | NM_001171095.2 |
|                  | R: AGATGGCGCTAGATGTCACC    |                |
| <i>ZO-1</i>      | F: GCCATCCACTCCTGCCTAT     | XM_005659811.1 |
|                  | R: CGGGACCTGCTCATAACTTC    |                |
| <i>Mucin-1</i>   | F: GTGCCGACGAAAGAACTG      | AY243508       |
|                  | R: TGCCAGGTTTCGAGTAAGAG    |                |
| <i>Mucin-2</i>   | F: CTGTGTGGGGCCTGACAA      | AK231524.1     |
|                  | R: AGTGCTTGCAGTCGAACTCA    |                |
| <i>GPR41</i>     | F: TGGGGTCTCAAAGAAGCAGT    | NM_005304.5    |
|                  | R: GTGATTGCCGGAGAAGTAGG    |                |
| <i>GPR43</i>     | F: CGTGTTTCATCGTTCAGTA     | XM_021093196.1 |
|                  | R: GAAGTTCTCATAGCAGGTA     |                |
| <i>GPR119</i>    | F: TGATGAATGGGCTTGTGGCT    | NM_001287850.1 |
|                  | R: CCCTTGTAGGTGGTCTGCTG    |                |
| <i>GPR120</i>    | F: TCCAGAACTTCAAGCAAAACCT  | NM_001204766.1 |
|                  | R:                         |                |

GTGACAAATAGATGCCGATAGACAA

---

11 GAPDH, glyceraldehyde-3-phosphate dehydrogenase; ZO-1, zonula occluden-1;

12 GPRs, G-protein coupled receptors.

13

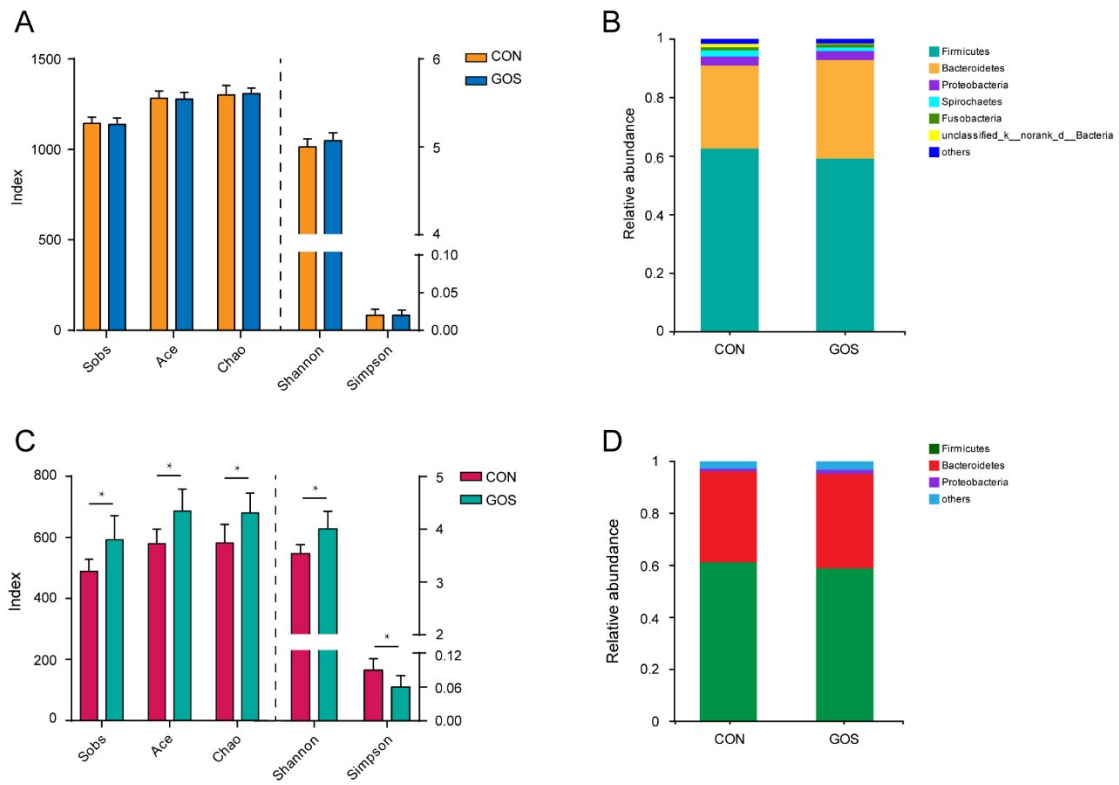

14

15 **Figure S1. Alpha diversity and microbial composition at phylum level of the sows**  
 16 **and their offspring**

17 Alpha diversity (Sobs index, Ace index, Chao index, Shannon index and Simpson  
 18 index) of sows (A) and offspring (C); percentages of community abundance at phylum  
 19 level of sows (B) and offspring (D). CON, sows fed basal diet; GOS, sows fed basal  
 20 diet plus galactooligosaccharides. \*  $P < 0.05$ . (n = 7 for sows and n = 5 for piglets per  
 21 group).

22

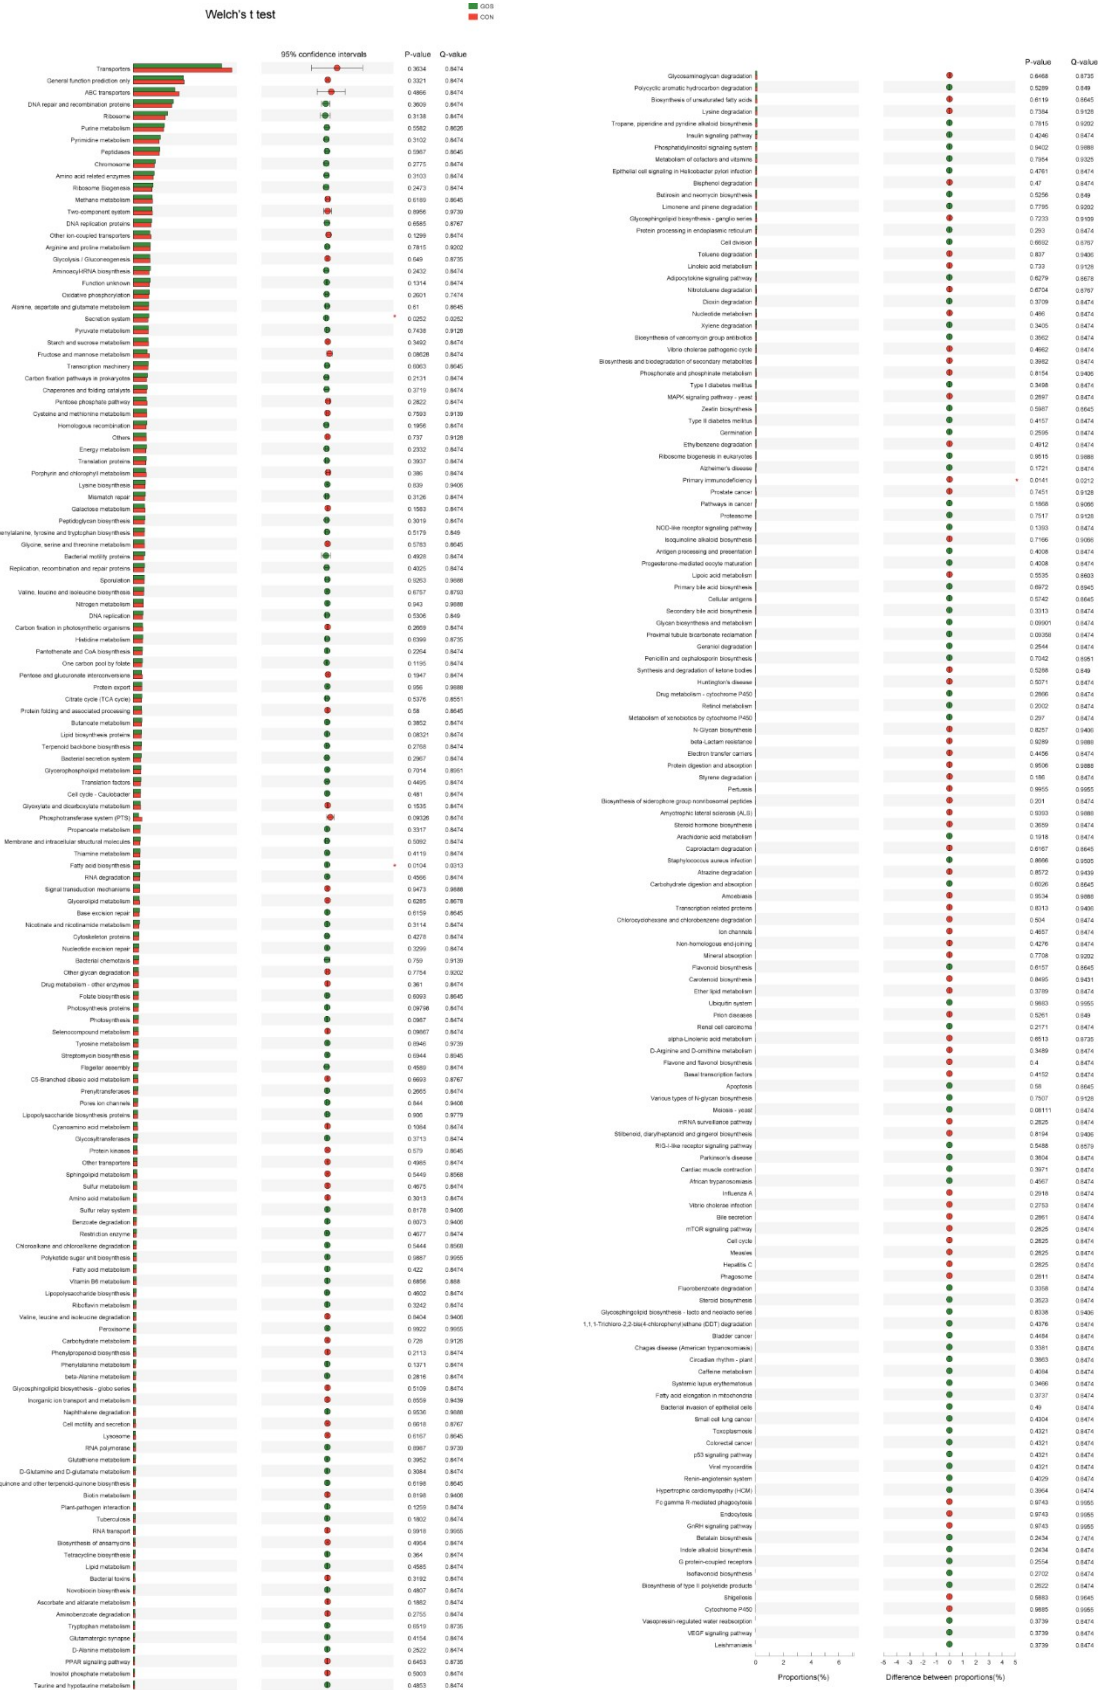

23

24 **Figure S2. Whole predictive pathways of Kyoto Encyclopedia of Genes and**

25 **Genomes (KEGG) annotation of piglets. CON, sows fed basal diet; GOS, sows fed**

5

26 basal diet plus galactooligosaccharides. \*  $P < 0.05$ ; \*\*  $P < 0.01$ .
